# Supplementary material for: LCP1 up-regulated by partial pancreatectomy supports cell proliferation and differentiation
Source: Royal Society of Chemistry journal article supplement (doi:10.1039/c1mb05326d), 2011-09-16
Supplement: c1mb05326d.pdf [file c1mb05326d.pdf]

**Supplementary data Table 1. Protein spots identified by MALDI-TOF / MS.**

| Spot ID                                         | Accession Number | Protein Name                                                   | Score | Matched Peptide | Sequence Coverage | Theoretical MW/PI | Ratio |
|-------------------------------------------------|------------------|----------------------------------------------------------------|-------|-----------------|-------------------|-------------------|-------|
| <b>Cell growth and proliferation</b>            |                  |                                                                |       |                 |                   |                   |       |
| 65                                              | gi 55562869      | translationally-controlled tumor protein                       | 58    | 8               | 30%               | 19450/4.76        | ∞     |
| 26                                              | gi 300797951     | mago-nashi homolog B                                           | 65    | 9               | 48%               | 23381/8.35        | 11.64 |
| 22                                              | gi 543829        | adenine phosphoribosyl-transferase (APRT)                      | 101   | 9               | 42%               | 19533/6.17        | 5.78  |
| 21                                              | gi 46485421      | bis(5'-nucleosyl)-tetraphosphatase                             | 61    | 8               | 71%               | 16919/5.35        | 3.09  |
| 49                                              | gi 150383503     | UMP-CMP kinase                                                 | 107   | 12              | 47%               | 22155/5.66        | 0.47  |
| 51                                              | gi 13929006      | RAB2A, member RAS oncogene family                              | 63    | 8               | 48%               | 23521/6.08        | 0.42  |
| 56                                              | gi 209364558     | centrosomal protein 290                                        | 62    | 29              | 13%               | 289504/5.91       | 0     |
| <b>Energy metabolism</b>                        |                  |                                                                |       |                 |                   |                   |       |
| 59                                              | gi 1083805       | sterol esterase (EC 3.1.1.13) precursor                        | 144   | 16              | 30%               | 67027/5.31        | ∞     |
| 68                                              | gi 51858584      | solute carrier family 27 (fatty acid transporter), member 2    | 63    | 15              | 33%               | 70650/8.82        | ∞     |
| 70                                              | gi 293357526     | PREDICTED: amylase 2a5, pancreatic                             | 70    | 6               | 59%               | 11933/9.64        | ∞     |
| 73                                              | gi 61556993      | 3-hydroxyisobutyryl-CoA hydrolase, mitochondrial               | 60    | 8               | 22%               | 47840/8.33        | ∞     |
| 18                                              | gi 6978515       | apolipoprotein A-I                                             | 130   | 16              | 50%               | 30043/5.52        | 3.59  |
| 44                                              | gi 11560131      | dimethylarginine dimethylaminohydrolase 1                      | 144   | 21              | 44%               | 31805/5.75        | 0.49  |
| 36                                              | gi 25990263      | mitochondrial aldehyde dehydrogenase                           | 161   | 19              | 40%               | 53809/5.70        | 0.47  |
| 43                                              | gi 6981112       | isovaleryl Coenzyme A dehydrogenase                            | 142   | 22              | 33%               | 46862/8.03        | 0.46  |
| 45                                              | gi 15100179      | malate dehydrogenase 1, NAD (soluble)                          | 73    | 12              | 35%               | 36631/6.16        | 0.46  |
| 34                                              | gi 149063967     | phosphoenolpyruvate carboxykinase 2                            | 153   | 30              | 45%               | 67708/7.89        | 0.45  |
| 33                                              | gi 57528264      | methylcrotonoyl-Coenzyme A carboxylase 1 (alpha)               | 227   | 34              | 41%               | 79564/6.66        | 0.34  |
| 50                                              | gi 157786894     | pyrroline-5-carboxylate reductase 1                            | 134   | 23              | 46%               | 32206/6.36        | 0.34  |
| 31                                              | gi 62654757      | similar to methylmalonyl-CoA mutase, mitochondrial precursor   | 126   | 24              | 32%               | 91977/7.59        | 0.32  |
| 32                                              | gi 129684        | propionyl-CoA carboxylase alpha chain, mitochondrial precursor | 200   | 28              | 34%               | 78289/6.33        | 0.3   |
| 40                                              | gi 13591949      | glycine amidinotransferase                                     | 99    | 19              | 35%               | 48724/7.17        | 0.26  |
| 41                                              | gi 13591949      | glycine amidinotransferase                                     | 153   | 27              | 42%               | 48724/7.17        | 0.26  |
| 35                                              | gi 148747576     | asparagine synthetase                                          | 222   | 29              | 44%               | 64776/6.01        | 0.18  |
| <b>Gene expression and protein modification</b> |                  |                                                                |       |                 |                   |                   |       |
| 71                                              | gi 109458729     | PREDICTED: liprin-alpha-3                                      | 61    | 20              | 16%               | 149841/5.95       | ∞     |
| 72                                              | gi 149018901     | zic family member 4, isoform CRA_a                             | 70    | 9               | 85%               | 7787/10.69        | ∞     |
| 75                                              | gi 55391508      | albumin                                                        | 89    | 14              | 22%               | 68714/6.09        | ∞     |
| 23                                              | gi 149048541     | carboxypeptidase B1, isoform CRA_b                             | 61    | 12              | 39%               | 43653/5.50        | 15.35 |
| 24                                              | gi 149068328     | importin 7 (predicted), isoform CRA_e                          | 50    | 10              | 32%               | 42425/6.80        | 9.56  |
| 46                                              | gi 16758848      | endoplasmic reticulum protein 29                               | 114   | 12              | 48%               | 28614/6.23        | 0.47  |

|    |             |                                                               |     |    |     |            |      |
|----|-------------|---------------------------------------------------------------|-----|----|-----|------------|------|
| 37 | gi 8393693  | laminin receptor 1                                            | 96  | 15 | 42% | 32917/4.80 | 0.41 |
| 52 | gi 51172600 | ubiquitin-fold modifier conjugating enzyme 1                  | 105 | 11 | 55% | 19651/6.90 | 0.41 |
| 42 | gi 72255515 | serine (or cysteine) proteinase inhibitor, clade B, member 1a | 182 | 26 | 49% | 42700/5.92 | 0.21 |
| 53 | gi 8393322  | protein disulfide isomerase associated 3                      | 247 | 27 | 49% | 57010/5.88 | 0    |
| 54 | gi 9506571  | eukaryotic translation initiation factor 2, subunit 1 alpha   | 234 | 28 | 53% | 36371/5.02 | 0    |
| 55 | gi 8394221  | ribosomal protein S3a                                         | 143 | 22 | 51% | 30154/9.75 | 0    |
| 58 | gi 9507019  | sec1 family domain containing 1                               | 216 | 33 | 48% | 72559/6.09 | 0    |

#### Stress and inflammation

|    |              |                                               |     |    |     |            |       |
|----|--------------|-----------------------------------------------|-----|----|-----|------------|-------|
| 60 | gi 529586    | fibrinogen B-beta-chain                       | 79  | 11 | 33% | 33926/8.06 | ∞     |
| 61 | gi 16757980  | orosomucoid 1                                 | 87  | 7  | 25% | 23560/5.64 | ∞     |
| 62 | gi 33086640  | Ba1-647                                       | 67  | 10 | 26% | 42447/6.11 | ∞     |
| 63 | gi 71830     | fibrinogen gamma-B chain precursor            | 79  | 11 | 30% | 50468/5.56 | ∞     |
| 15 | gi 33086640  | Ba1-647                                       | 72  | 10 | 20% | 42447/6.11 | 12.31 |
| 17 | gi 71830     | fibrinogen gamma-B chain precursor            | 79  | 13 | 37% | 50468/5.56 | 6.34  |
| 19 | gi 33086640  | Ba1-647                                       | 73  | 12 | 24% | 42447/6.11 | 3.88  |
| 16 | gi 29028310  | platelet-activating factor acetylhydrolase II | 62  | 8  | 25% | 43464/6.23 | 3.1   |
| 14 | gi 51259324  | fibrinogen gamma chain                        | 93  | 16 | 33% | 49620/5.85 | 2.88  |
| 28 | gi 70794740  | interleukin-1 receptor-associated kinase 2    | 56  | 15 | 25% | 69193/5.97 | 2.49  |
| 48 | gi 11968132  | peroxiredoxin 3                               | 75  | 9  | 40% | 28589/7.14 | 0.43  |
| 47 | gi 16758274  | peroxiredoxin 4                               | 123 | 11 | 39% | 30988/6.18 | 0.42  |
| 39 | gi 149069193 | similar to Glutathione S-transferase A1       | 69  | 5  | 87% | 7280/6.08  | 0.41  |

#### Etc

|    |              |                                                         |     |    |     |              |      |
|----|--------------|---------------------------------------------------------|-----|----|-----|--------------|------|
| 64 | gi 293357925 | PREDICTED: ATP/GTP binding protein-like 2               | 56  | 20 | 27% | 102305/8.77  | ∞    |
| 66 | gi 149029060 | rCG41048, isoform CRA_a                                 | 75  | 45 | 13% | 440273/5.00  | ∞    |
| 67 | gi 33086658  | Cc1-6                                                   | 59  | 8  | 25% | 43052/8.46   | ∞    |
| 69 | gi 149025754 | rCG28529, isoform CRA_b                                 | 86  | 10 | 26% | 57093/7.92   | ∞    |
| 74 | gi 149066873 | nucleoporin 107, isoform CRA_a                          | 62  | 17 | 17% | 1006809/5.31 | ∞    |
| 30 | gi 157817027 | coiled-coil-helix-coiled-coil-helix domain containing 3 | 46  | 15 | 31% | 42141/9.42   | 8.6  |
| 27 | gi 293354252 | PREDICTED: FSHD region gene 1                           | 44  | 7  | 32% | 20183/6.24   | 7.22 |
| 29 | gi 149041991 | rCG58343                                                | 62  | 13 | 34% | 55697/9.88   | 5.26 |
| 13 | gi 38181879  | Clu protein                                             | 64  | 8  | 26% | 51431/5.53   | 3.42 |
| 20 | gi 1487990   | Ott                                                     | 59  | 7  | 29% | 26968/11.98  | 3.4  |
| 11 | gi 58865656  | lymphocyte cytosolic protein 1                          | 90  | 14 | 34% | 70078/5.15   | 3.03 |
| 12 | gi 33086660  | Cc1-8                                                   | 105 | 20 | 22% | 107343/8.35  | 2.59 |
| 25 | gi 149044856 | spectrin beta 2, isoform CRA_a                          | 55  | 28 | 15% | 273893/5.41  | 2.32 |
| 38 | gi 84781638  | ectoderm-neural cortex protein 2                        | 64  | 13 | 21% | 65798/6.32   | 0.26 |
| 57 | gi 149052721 | rCG33997                                                | 56  | 6  | 88% | 4682/9.35    | 0    |

∞ : protein spots newly introduced in the PPX 2-DE gel.

**Supplementary data Table 2. Genes reproducibly up-regulated or down-regulated by partial pancreatectomy.**

**A. Up-regulated genes**

| <b>Gene / Protein</b>                    | <b>Target of Assay</b> | <b>ACCESS NO.</b>                                | <b>REFERENCE</b> |
|------------------------------------------|------------------------|--------------------------------------------------|------------------|
| actin related protein homolog            | protein / mRNA         | gi 34879484, NM_016860                           | [1], [2]         |
| ADP-ribosylation factor                  | Protein / mRNA         | P41276, BG142914                                 | [2], [3]         |
| albumin                                  | Protein                | gi 19705431, gi 55391508                         | [1], [*]         |
| amyloid beta precursor like protein      | mRNA                   | NM_009691, XM_001055798                          | [2], [4]         |
| apolipoprotein A-I                       | Protein                | gi 55747, gi 6978515                             | [1], [*]         |
| cytokeratin 8                            | protein / mRNA         | gi 203734                                        | [1], [4]         |
| fibrinogen gamma chain precursor         | Protein                | gi 1346007, gi 71830                             | [1], [*]         |
| lymphocyte cytosolic protein 1           | Protein                | gi 34875362, gi 58865656                         | [1], [*]         |
| MAPK1                                    | Protein                | gi 1942172, 204052                               | [1], [3]         |
| <i>Reg3</i>                              | mRNA                   | NM_0011036, NM_0011260, NM_013893, NM_172077     | [2], [4]         |
| serine proteinase inhibitor              | protein / mRNA         | gi 55824765, gi 34935459, gi 34875374, NM_025429 | [1], [2]         |
| sterol esterase                          | Protein                | 311386, gi 1083805                               | [3], [*]         |
| translationally-controlled tumor protein | protein / mRNA         | NM_009429, gi 55562869                           | [2], [*]         |
| x-box binding protein 1                  | mRNA                   | NM_013842, NM_001004210                          | [2], [4]         |

**B. Down-regulated genes**

| <b>Gene / Protein</b>                  | <b>Target of Assay</b> | <b>ACCESS NO.</b>         | <b>REFERENCE</b> |
|----------------------------------------|------------------------|---------------------------|------------------|
| L-arginine: glycine amidinotransferase | Protein                | gi 13591949               | [1], [*]         |
| isovaleryl coenzyme A dehydrogenase    | Protein                | gi 6981112                | [1], [*]         |
| phosphoenolpyruvate carboxykinase 2    | Protein                | gi 34874156, gi 149063967 | [1], [*]         |

[1] Yang et al; [2] De Leon et al; [3] Shin et al; [4] Choi et al; [\*] Present study

**Supplementary data Table 3. Summary of the five omic studies on partial pancreatectomy.**

| Study                       | Animal                                   | Mode of Partial Pancreatectomy | Sampling Time     | Analytical Method                         | Protein/Gene Identification                                                                                                                                                                           |
|-----------------------------|------------------------------------------|--------------------------------|-------------------|-------------------------------------------|-------------------------------------------------------------------------------------------------------------------------------------------------------------------------------------------------------|
| Yang et al.<br>(Ref. 17)    | Wistar rats;<br>150~160g                 | 90%                            | 72 hrs            | 2-DE/MS and mass fingerprinting analyses. | 91 spots with at least 1.5-fold change in the expression (41 up-regulated spots and 50 down-regulated spots) were selected and 53 proteins were identified and listed.                                |
| De Leon et al.<br>(Ref. 18) | BALB/c mice;<br>8~9 week old male        | ~50% and exendin-4 treatment   | 12, 24 and 48 hrs | cDNA Microarray (PancChip4.0)             | The expressions of about 10,000 pancreas-enriched mRNA were identified. Listed 100 genes differentially expressed at 24 hrs after operation and 38 genes at 48 hrs after operation.                   |
| Shin et al.<br>(Ref. 19)    | Wistar-Kyoto rats; 5 weeks old           | 60%                            | 48 hrs            | 2-DE and MALDI-TOF/MS analyses            | 137 spots with significant ( $p < 0.05$ ) change in the expression (76 up-regulated spots and 61 down-regulated spots) were selected and 121 proteins were identified. Listed 64 identified proteins. |
| Choi et al.<br>(Ref. 20)    | Sprague-Dawley rats;<br>8 week old male; | 60%                            | 48 hrs            | cDNA subtractive hybridization            | 418 cDNA clones were checked with restriction enzyme and 95 clones were selected for DNA sequencing. Identified 12 genes up-regulated after operation.                                                |
| Present study               | Sprague-Dawley rats;<br>8 week old male; | 60%                            | 48 hrs            | 2-DE and MALDI-TOF analyses               | 65 spots with at least 2-fold change in the expression (37 up-regulated spots and 28 down-regulated spots) were selected and 61 proteins were identified and listed.                                  |

**Supplementary data Table 4. Novel genes or proteins identified from five different omics studies on partial pancreatectomy.**

| Study                      | Novel Genes or Protein identified                                                                                                                                                                                                                                                                                                                                                                                                                                                                                                                                                                                                                                                                                                                 |
|----------------------------|---------------------------------------------------------------------------------------------------------------------------------------------------------------------------------------------------------------------------------------------------------------------------------------------------------------------------------------------------------------------------------------------------------------------------------------------------------------------------------------------------------------------------------------------------------------------------------------------------------------------------------------------------------------------------------------------------------------------------------------------------|
| De Leon et al<br>(Ref. 18) | Gene transcript :<br>Barstead stromal cell line MPLRB8 (CV677934), Ko mouse embryo 11 5dpc (AA387288), Melton Mouse E16 5 Pancreas Library 2 M16B2 (BG141869), Melton Normalized Mixed Mouse Pancreas 1 N1-MMS1 (BI677082, BI677037, BI963673, BI901383, BI440178, BI963629, BI962378), Mitochondrial fission factor (NM_029409), Mus musculus adult male tongue (AK009749, AK049931), NIH_MGC_140 Mus musculus cDNA clone (CF586721, CF586560), RNA binding motif protein 26 (NM_134077), Soares mouse NML Mus musculus (AA237895), Soares_thymus_2NbMT (AA204455), Stratagene mouse heart (#937316) Mus musculus cDNA clone (CV700478), Sugano mouse kidney mkia (AI182303, AI315959), von Willebrand factor A domain containing 5A (NM_172767) |
| Shin et al<br>(Ref. 19)    | Protein :<br>30S ribosomal protein S19 (gi 133850), GPN-loop GTPase 2 (gi 19527098), Suppressor of IKBKE 1 (gi 13385140), Unnamed protein product (gi 12835985, gi 12853241)                                                                                                                                                                                                                                                                                                                                                                                                                                                                                                                                                                      |
| Choi et al<br>(Ref. 20)    | Gene transcript :<br>Exostoses 1 (XM_216920), LOC502894 (NM_001025064)                                                                                                                                                                                                                                                                                                                                                                                                                                                                                                                                                                                                                                                                            |
| Present study              | Protein :<br>Coiled-coil-helix-coiled-coil-helix domain containing 3 (gi 157817027), FSHD region gene 1 (gi 293354252), rCG28529 (gi 149025754), rCG33997 (gi 149052721), rCG41048 (gi 149029060), rCG58343 (gi 149041991)                                                                                                                                                                                                                                                                                                                                                                                                                                                                                                                        |

**Note :** Novel proteins were not identified from Yang et al. (Ref. 17) other than the reproducibly regulated proteins that are listed in Supplementary data Table 2.
